# 1 Evolutionary mysteries in meiosis

2

3 Thomas Lenormand<sup>1</sup>, Jan Engelstädter<sup>2</sup>, Susan E. Johnston<sup>3</sup>, Erik Wijnker<sup>4</sup>, Christoph R.  
4 Haag<sup>1</sup>

5

6 <sup>1</sup> Centre d'Ecologie Fonctionnelle et Evolutive (CEFE)–Unité Mixte de Recherche 5175, Centre National de la  
7 Recherche Scientifique (CNRS)–Université de Montpellier–Université Paul-Valéry Montpellier–Ecole  
8 Pratique des Hautes Etudes (EPHE), 1919 Route de Mende, 34293 Montpellier Cedex 5, France

9 <sup>2</sup> School of Biological Sciences, The University of Queensland, Brisbane, QLD 4072, Australia

10 <sup>3</sup> Institute of Evolutionary Biology, University of Edinburgh, Charlotte Auerbach Road, Edinburgh EH9 3FL,  
11 United Kingdom

12 <sup>4</sup> Laboratory of Genetics, Wageningen University, Droevendaalsesteeg 1, 6708 PB Wageningen, the  
13 Netherlands

14

15 Keywords: genetic conflicts, recombination, two-step meiosis, polyploidy, inverted meiosis, automixis,  
16 epigenetic resetting, asymmetrical meiosis, meiosis fairness, crossover interference, hotspots,  
17 heterochiasmy.

18

## 19 Abstract

20 Meiosis is a key event of sexual life cycles in eukaryotes. Its mechanistic details have been  
21 uncovered in several model organisms, and most of its essential features have received  
22 various and often contradictory evolutionary interpretations. In this perspective, we  
23 present an overview of these often “weird” features. We discuss the origin of meiosis  
24 (origin of ploidy reduction and recombination, two-step meiosis), its secondary  
25 modifications (in polyploids or asexuals, inverted meiosis), its importance in punctuating  
26 life cycles (meiotic arrests, epigenetic resetting, meiotic asymmetry, meiotic fairness) and  
27 features associated with recombination (disjunction constraints, heterochiasmy,  
28 crossover interference and hotspots). We present the various evolutionary scenarios and  
29 selective pressures that have been proposed to account for these features, and we  
30 highlight that their evolutionary significance often remains largely mysterious. Resolving  
31 these mysteries will likely provide decisive steps towards understanding why sex and  
32 recombination are found in the majority of eukaryotes.

33

## 34 Introduction

35 In eukaryotic sexual life cycles, haploid cells fuse to give rise to diploids, before diploid  
36 cells are converted back to haploids in a process known as meiosis. Meiosis reduces a

37 cell's chromosome number by half, whilst also creating new allele combinations  
38 distributed across daughter cells through segregation and recombination. This genetic  
39 reshuffling reduces genetic associations within and between loci and is thought to be the  
40 basis of the success of sexual reproduction. Mechanistic studies of meiosis have been  
41 carried out in different fields, such as cell biology, genetics and epigenetics, encompassing  
42 a wide range of eukaryotes. However, these studies rarely focus on the evolutionary  
43 significance of meiotic mechanisms, rather mentioning them in passing and often in a  
44 simplified manner. In evolutionary biology studies, meiosis is often simplified and  
45 represented by random assortment of chromosomes and recombination maps expressing  
46 the probability of recombination events between ordered loci, with little attention to the  
47 molecular and cellular details. While these simplifications are legitimate and useful in  
48 many cases, the wealth of mechanistic findings being uncovered points to a considerable  
49 number of evolutionary puzzles surrounding meiosis that have yet to be resolved. Indeed,  
50 in the following perspective, we will show that close scrutiny of almost every aspect of  
51 meiosis will reveal “weird” features that constitute evolutionary mysteries.

52

## 53 1. The origins of meiosis

54 The origin of meiosis through gradual steps is among the most intriguing evolutionary  
55 enigmas [1,2]. Meiosis is one of the ‘major innovations’ of eukaryotes that evolved before  
56 their subsequent radiation over one billion years ago [3–5]. Extant eukaryotes share a set  
57 of genes specifically associated with meiosis, implying that it evolved only once before  
58 their last common ancestor [6,7]. Identifying the selective scenario that led to its early  
59 evolution is difficult, but clues can be obtained by determining (i) which mitotic cellular  
60 processes were re-used in meiosis (e.g. DNA repair through homologous recombination  
61 and possibly reduction), (ii) which selective steps were involved in the assembly of the  
62 full cellular process, and (iii) why different forms of meiosis were perhaps less successful.

63

### 64 1.1 The origin of ploidy reduction

65 A form of reductional cell division (a.k.a. ‘proto-meiosis’) probably evolved in early  
66 asexual unicellular eukaryotes. Two scenarios for this have been proposed. The first is  
67 that diploidy accidentally occurred by replication of the nuclear genome without  
68 subsequent cell division (“endoreplication”) [8–12], and that returning to haploidy was  
69 selected for to correct this. Because either haploidy or higher ploidy levels may be  
70 favoured in different ecological situations [13,14], a variant of this scenario is that a proto-  
71 meiosis–endoreplication cycle evolved to switch between ploidy levels [5]. The resulting

72 life cycle may have resembled modern ‘parasexual’ fungi in which diploid cells lose  
73 chromosomes in subsequent mitotic divisions, leading to haploidy via aneuploid  
74 intermediates [15]. Many other modern eukaryotes also increase and decrease their  
75 ploidy somatically, depending on growth stage or specific environmental stimuli [16]. The  
76 second scenario is that proto-meiosis evolved in response to the fusion of two haploid  
77 cells (“syngamy”), as in standard modern eukaryotic sexual life cycles. Syngamy may have  
78 been favoured because it allows recessive deleterious mutations to be masked in diploids  
79 [1,12]. A difficulty with this idea is that such masking may not be sufficient to favour  
80 diploidy in asexuals [17]. In a variant of this scenario, early syngamy evolved as a result  
81 of ‘manipulation’ by selfish elements (plasmids, transposons) to promote their horizontal  
82 transmission [18]. In support of this view, mating-type switching (which can allow  
83 syngamy in haploid colonies) has evolved multiple times in yeasts and involves  
84 domesticated mobile genetic elements [19].

85

## 86 1.2 The origin of homologue pairing and meiotic recombination

87 Meiosis requires the correct segregation of homologues, which is achieved by homologue  
88 pairing at the beginning of prophase I (Fig. 1). This homology search is mediated by the  
89 active formation of numerous DNA double-strand breaks (DSBs) followed by chiasmata  
90 formation, but less well-known mechanisms of recombination-independent pairing also  
91 exist [20]. Non-homologous centromere coupling is also often observed at this stage, but  
92 the functional and evolutionary significance of this coupling is elusive [21]. In many  
93 species, chromosome pairing is further strengthened by ‘synapsis’, which is the formation  
94 of a protein structure known as the synaptonemal complex [22] and the pairing of  
95 homologous centromeres [21]. Chiasmata are then resolved as either crossovers  
96 (hereafter ‘COs’) resulting in the exchange of large chromatid segments, or non-  
97 crossovers (‘NCOs’), where both situations cause gene-conversion events [23]. The  
98 synaptonemal complex then disappears, and homologues remain tethered at CO positions  
99 and centromeres. The precise function of the synaptonemal complex is not entirely  
100 understood [20]; one possibility is that it may serve to stabilise homologues during CO  
101 maturation. Some pairing mechanism must be advantageous to ensure proper  
102 segregation of homologues, but the origins and selective advantage of extensive pairing,  
103 synapsis, gene conversion and recombination remain poorly understood [24].

104 Most evidence suggests that homologous recombination evolved long before meiosis, as  
105 it occurs in all domains of life and involves proteins that share strong homology [25,26].  
106 One hypothesis is that meiotic pairing and extensive homologous recombination in

107 meiosis evolved to avoid the burden and consequences of non-allelic ectopic  
108 recombination in the large genomes of early eukaryotes, which presumably had many  
109 repetitive sequences [9,27,28]. Such sequences may have been related to the spread of  
110 retrotransposons in early eukaryotes, of which many types are very ancient in  
111 eukaryotes, but absent in bacteria and archaea [29]. A second possibility is that  
112 recombination arose by the spread of self-promoting genetic elements exploiting the  
113 machinery of DNA repair and associated gene conversion [30]. Another hypothesis is that  
114 pairing and recombination initially arose as a way to repair mutational damage caused by  
115 increased oxidative stress due to rising atmospheric oxygen or endosymbiosis [7,31–33].  
116 This scenario presupposes that DNA maintenance is inefficient in the absence of meiosis;  
117 however, prokaryotes (including archaea) have efficient repair mechanisms that involve  
118 recombination, but not meiosis [9]. In addition, this scenario does not fit well with the  
119 observation that a large number of DSBs are actively generated at the onset of meiosis  
120 [1,34].

121

### 122 1.3 The origin of two-step meiosis

123 A particular feature of meiosis is that it starts with chromosome doubling (S phase, see  
124 Fig. 1) before meiosis occurs (Fig. 2A). For ploidy reduction, the initial steps appear  
125 superfluous [35]. A simpler single-step cell division, without the initial DNA replication  
126 phase, could in principle achieve ploidy reduction (Fig. 2B). Recombination may not be a  
127 crucial difference between one- and two-step meiosis, as both can involve COs, even if  
128 with one CO, the two meiotic products carry recombinant chromosomes in one-step  
129 meiosis, whereas only two out of four are recombinant in two-step-meiosis [36]. Three  
130 hypotheses have been proposed to account for two-step meiosis. The first postulates that  
131 two-step meiosis better protects against particular selfish genetic elements (SGEs) that  
132 increase their transmission frequencies by sabotaging the meiotic products in which they  
133 do not end up (known as ‘sister killers’, distinct from the ‘sperm killers’ discussed below)  
134 [37]. In a two-step meiosis, there is uncertainty as to whether the reductional division is  
135 meiosis I or II, meaning that the sabotage mechanism has a much reduced efficacy.  
136 Microsporidia and red algae show specific modifications to meiosis that increase such  
137 uncertainty even more [38]. However, such sister killers are hypothetical, and theoretical  
138 studies based on assumptions about how different killers might act suggest that this  
139 mechanism does not inevitably promote the development of a two-step meiosis [39]. The  
140 second hypothesis is that sexual species with one-step-meiosis would be vulnerable to  
141 invasion by asexual mutants, and have thus gone disproportionately extinct in the past.

142 Contrary to one-step meiosis, most automictic modifications of two-step meiosis involve  
143 a loss of heterozygosity with each generation (see section 2.3), which would cause  
144 expression of recessive and partially recessive deleterious mutational effects, and reduce  
145 the fitness of newly emerging asexual mutants [36]. Finally, a third hypothesis posits that  
146 a one-step-meiosis is more complex and thus less likely to evolve than a two-step-meiosis  
147 [9]. Mitotic and meiotic cell cycles start similarly with DNA replication in response to  
148 increasing cyclin-dependent kinase (CDK) activity. Two-step meiosis can be achieved  
149 simply by modulating CDK activity at the end of a cell cycle to add a second division event  
150 [40]. In contrast, a one-step meiosis would require extensive modification of the mitotic  
151 cycle. Despite earlier suggestions of its presence in some basal eukaryotes (protists)  
152 [8,41], there are presently no firm indications that one-step meioses exist in nature  
153 [38,42], although inverted meiosis (see below) is genetically similar to mitosis followed  
154 by single-step meiosis.

155

## 156 2. Secondary modifications of meiosis

157 Meiosis is remarkably conserved across eukaryotes. Nevertheless, in many species,  
158 variants exist that may offer insights into the evolutionary origins and mechanistic  
159 constraints of meiosis. Here, we discuss three of these modifications: meiosis in  
160 polyploids, inverted meiosis and meiosis in asexual organisms.

161

### 162 2.1 Meiosis and polyploidy

163 Polyploidy is surprisingly common in eukaryotes given the considerable problems it  
164 poses to meiosis [43–45]. In diploids, homologous chromosomes recognise each other  
165 and align to form bivalents during Prophase I, but when there are three or more  
166 chromosomes with sufficient homology, these chromosomes may all align to varying  
167 degrees, forming multivalents. This can occur when all chromosome sets originate from  
168 the same species (autopolyploidy), but also when polyploidy is a result of hybridisation  
169 (allopolyploidy). Multivalent formation is often associated with mis-segregation of  
170 chromosomes (Fig. 2C) as well as chromosomal rearrangements arising from  
171 recombination within multivalents, leading to reduced fertility and low-fitness offspring  
172 [e.g. 46,47,48]. These problems may be compounded in allopolyploids because  
173 recombination homogenises partially differentiated chromosomes, thereby further  
174 increasing the likelihood that they will pair [the ‘polyploid ratchet’: 46].

175

176 Given these detrimental effects, the existence of successful polyploid species and lineages  
177 indicates that natural selection can often promote transitions from multi- to bivalents that  
178 will then segregate as in diploids (compare Figs. 2C & D) [e.g. 50,51]. However, how such  
179 transitions are achieved at the molecular level remains a mystery. Part of the answer  
180 seems to be a reduction in the number of COs, since multivalents can only form with at  
181 least two COs per chromosome [51–53]. This mechanism seems particularly important in  
182 autopolyploids and may be achieved through increasing CO interference (see section 4.2  
183 for definition) [54]. Several candidate genes that may affect such modifications have been  
184 identified in the autotetraploid *Arabidopsis arenosa* [51,55]. In allopolyploids, there is  
185 evidence for genes that have been selected to strengthen the preferential pairing of  
186 homologous (i.e. of the same origin, rather than ‘homeologous’) chromosomes, including  
187 *ph1* in hexaploid wheat [56]. This preferential pairing can also be achieved through  
188 reducing CO numbers, specifically those between homeologues; this could indirectly  
189 produce an increase in CO numbers and hence recombination rates between homologues  
190 [43]. Intriguingly, because most extant organisms have a history of polyploidy, many  
191 features of ‘standard’ meiosis such as CO interference may have been shaped by the  
192 problems involved in multivalent segregation.

193

194 Polyploidy with odd numbers of chromosome sets poses an even greater problem  
195 because aneuploid gametes are generally produced [e.g. 57]. However, there are some  
196 plant species where solutions to even this problem have evolved, and where odd-number  
197 polyploidy appears to persist in a stable manner. In these species, the problem of unequal  
198 segregation during meiosis is solved through exclusion of univalents in one sex but  
199 inclusion in the other, leading, for example, to haploid sperm and tetraploid eggs in  
200 pentaploid dog roses [58].

201

## 202 2.2 Inverted meiosis

203 In normal meiosis, homologous chromosomes are separated during meiotic division I, whereas  
204 sister chromatids are separated during meiosis II. Why meiosis generally follows this order is  
205 unknown, but interestingly, in some species meiosis takes place in the reverse order (Fig. 2E),  
206 including some flowering plants [59–61], mites [62], true bugs [63], and mealybugs [64]. All  
207 species with this ‘inverted’ meiosis described to date seem to have holocentric chromosomes  
208 (i.e. the kinetochores are assembled along the entire chromosome, rather than at localised  
209 centromeres). Inverted meiosis is viewed as a possible solution to specific problems of  
210 kinetochore geometry in such meiosis [65]. Yet, intriguing as they are, these systems provide  
211 little insight into why inverted meiosis is absent or very rare in monocentric species.

212

213 It is conceivable that a reverse order of divisions would make meiosis more vulnerable to  
214 exploitation by meiotic drive or sister killer SGEs, but to the best of our knowledge, there is  
215 currently neither theoretical nor empirical support for this idea. Another possibility is that  
216 meiosis I tends to be reductional because it allows for DSB repair by sister chromatid exchange  
217 in arrested female meiosis [66]. Alternatively, the order of meiotic divisions could merely be a  
218 ‘frozen accident’, i.e., a solution that has been arrived at a long time ago by chance, and that  
219 reversal is difficult (at least with monocentric chromosomes). However, a recent paper  
220 investigating human female meioses in unprecedented detail casts doubt on this view [67]. The  
221 careful genotyping of eggs (or embryos) and polar bodies at many markers indicated that  
222 surprisingly often, chromosomes followed an ‘inverted meiosis’ pattern of segregation, even  
223 though this led to aneuploidies in ~23% of cases. The question of why one order of meiotic  
224 divisions is almost universal therefore remains unresolved.

225

### 226 2.3 Meiosis modifications and loss of sex

227 Many organisms have abandoned canonical sexual reproduction, reproducing asexually  
228 by suppressing or modifying meiosis and producing diploid eggs that can develop without  
229 fertilisation. This raises two connected mysteries: why are some types of modifications  
230 much more frequent than others, and how can mitotic (or mitosis-like) asexual  
231 reproduction (“apomixis” or “clonal parthenogenesis” in animals, “mitotic apomixis” in  
232 plants) evolve from meiosis? Examples of meiosis-derived modes of asexual reproduction  
233 include chromosome doubling prior to meiosis (“endomitosis” or “pre-meiotic  
234 doubling”), fusion of two of the four products of a single meiosis (“automixis” in animals,  
235 “within-tetrad mating” in fungi), and suppression of one of the two meiotic divisions  
236 (included under “automixis” or “meiotic apomixis”, depending on the author; see [68–74]  
237 for detailed descriptions of these processes).

238

239 Two particularly common modes of asexuality are the suppression of meiosis I, and  
240 automixis involving fusing meiotic products that were separated during meiosis I  
241 (“central fusion”, Fig. 2F). Both are genetically equivalent and lead to reduced  
242 heterozygosity when there is recombination between a locus and the centromere of the  
243 chromosome on which it is located. Most other forms of meiosis-derived asexual  
244 reproduction lead to a much stronger reduction in offspring heterozygosity [75–79], and  
245 it has been hypothesised that the reduced fitness of homozygous progeny explains the  
246 rarity of these other forms [71,78,80]. Indirect support comes from the observation that  
247 species with regular asexual reproduction usually do so by central fusion or suppression

248 of meiosis I, often accompanied by very low levels of recombination, thus maintaining  
249 heterozygosity. In contrast, species that only rarely reproduce asexually show a wider  
250 variety of asexual modes and higher levels of recombination [1,71,73,81,82]. Nonetheless,  
251 this hypothesis cannot explain some observations, for instance the rarity of pre-meiotic  
252 doubling with sister-chromosome pairing, which would also efficiently maintain  
253 heterozygosity [71]. Perhaps evolving a mechanism that ensures exclusive sister-pairing  
254 (i.e. the complete absence of non-sister pairing) is difficult, though it seems to occur in  
255 some lizard species [83]. In addition, such a system would make it difficult to repair DSBs  
256 occurring before doubling (as both sister chromatids would have the same DSBs) [71].

257

258 The question of how a mitotic asexual mutant can invade a sexual species is at the heart  
259 of the debate on the evolutionary maintenance of sex, as this is what is investigated in  
260 most theoretical models, and is the situation where the cost of sex is most evident [1].  
261 However, unless meiosis can be entirely bypassed (e.g. as with vegetative reproduction),  
262 secondary asexuality is likely to evolve via modification of meiosis, keeping much of the  
263 cell signalling and machinery intact [65,76,80,81, see also section 3]. Indeed, detailed  
264 cytological and genetic investigations in several asexual species thought to reproduce  
265 clonally by mitotic apomixis have uncovered remnants of meiosis [73,86–88]. In *Daphnia*,  
266 meiosis I is aborted mid-way and a normal meiosis II follows. Hence, clonality in *Daphnia*  
267 is meiotically derived [86]. This should lead to loss of heterozygosity in centromere-distal  
268 regions, but if recombination is fully suppressed the genetic outcome resembles mitosis.  
269 Importantly, this suggests a possible stepwise route to evolution of mitosis-like  
270 asexuality. Rare automixis (spontaneous development of unfertilised eggs) occurs in  
271 many species [1,81]. If this becomes more common, forms of automixis maintaining  
272 heterozygosity in centromere regions might be selectively favoured and recombination  
273 suppressed, eventually leading to meiosis-derived asexuality with the same genetic  
274 consequences as mitosis [84,85,89–91]. Indeed, in *Arabidopsis*, meiosis can be  
275 transformed to genetically resemble mitosis, but modification of several genes is needed  
276 to achieve this [92–94]. In angiosperms, there is also the difficulty to overcome the  
277 absence of endosperm fertilization to achieve proper seed development, which further  
278 stresses that meiosis-derived asexuality is unlikely to evolve in a single step. To fully  
279 understand the evolutionary maintenance of sex, we may therefore need to understand  
280 the selection pressures acting in the intermediate stages, which probably involve loss of  
281 heterozygosity, and thus inbreeding depression [77,80]. In many cases, the initial  
282 evolution of asexuality may thus resemble the evolution of self-fertilisation, and several



283 traits may pre-exist (such as low recombination rates) that make the successful transition  
284 to asexuality more likely in some taxa.

285

### 286 3. Meiosis punctuates life cycles

287 Meiosis is a key step in sexual life cycles, as well as some asexual life cycles derived from  
288 sexual ancestors. In multicellular eukaryotes, where meiosis is tightly associated with  
289 reproduction (unlike in many protists), meiosis is also a cellular and genetic bottleneck  
290 at the critical transition between the diploid and the haploid phases.

291

#### 292 3.1 Meiosis timing and arrest

293 In early haploid eukaryotes, meiosis probably quickly followed endomitosis or syngamy.  
294 Today, multicellular eukaryotes exhibit a variety of life cycles in which the haploid or  
295 diploid phase may predominate. The duration of the different phases was perhaps  
296 initially controlled in part by the timing of meiosis -- for instance, a multicellular, extended  
297 diploid phase likely evolved by postponing meiosis. However, in metazoans, life cycles are  
298 mostly determined by the extent of somatic development within each phase rather than  
299 by the timing of meiosis, which can be halted or postponed. In animals, where haploid  
300 mitosis is suppressed, syngamy immediately follows meiosis. Furthermore, specific cells  
301 are 'destined' at an early stage to eventually undergo meiosis (a.k.a. germline), whereas  
302 this cell fate is determined much later in fungi, plants and some algae.

303

304 The timing of meiosis in the germline of animals has been intensively investigated.  
305 Whereas male meiosis occurs continuously, female meiosis usually stops twice (Fig. 1).  
306 These 'meiotic arrests' are under the control of various factors that are not completely  
307 identified across animals [95–97]. Arrest 1 occurs in prophase I during early development  
308 and can last years until sexual maturity. The timing of arrest 2 is more variable (ranging  
309 from metaphase I in many invertebrates, to metaphase II in vertebrates and G1 phase  
310 after meiosis II in some echinoderms), and may have evolved to prevent the risk of  
311 premature parthenogenetic cleavage of oocytes or inappropriate DNA replication before  
312 fertilisation [97,98]; this is supported by the fact that this arrest is usually released by  
313 fertilisation. However, the evolutionary significance of its precise timing in diverse groups  
314 is not well understood. Three ideas have been put forward to explain arrest 1 [66]. First,  
315 its occurrence at prophase I may allow the repair of accidental DSBs by sister chromatid  
316 exchange during long periods between arrests 1 and 2. Second, if arrest 1 was to occur  
317 during an earlier mitotic division within the germline, this might decrease the variance in

318 the number of deleterious mutations among gametes within individuals, which may be  
319 detrimental if some defective gametes or early embryos can be eliminated and replaced  
320 during reproduction. Third, it may be easier to prevent uncontrolled proliferation in a  
321 non-dividing meiotic oocyte, as once the cell starts the meiotic cell division, it cannot  
322 engage in further mitotic divisions. Arrest 1 may thus have evolved to control (and  
323 minimise) the number of possibly wasteful and mutagenic mitotic divisions in the female  
324 germline. Similar meiotic arrests in plants are unknown. Plants seem to completely lack  
325 strict mechanisms to arrest the meiotic cell division. Contrary to animals and fungi that  
326 may arrest the cell cycle and abort meiosis once DSBs are not repaired, plants will  
327 progress through meiosis irrespective of such major defects [40].

328

### 329 3.2 Meiosis and epigenetic reset

330 Meiosis and syngamy represent critical transitions between haploid and diploid phases  
331 in each generation. It has been suggested that a primary function of meiosis is to allow for  
332 epigenetic resetting in eukaryotes [99]. For instance, metazoan development is under the  
333 control of many epigenetic changes (cytosine methylation and chromatin marks) that are  
334 irreversibly maintained throughout life and must be reset twice each generation (at the  $n$   
335  $\rightarrow 2n$  and  $2n \rightarrow n$  transitions). This ensures proper development, the acquisition of parent-  
336 specific imprints, and may allow for mechanisms limiting the maximal number of possible  
337 successive mitoses (“Hayflick limit”, reducing tumour development [99]). Some loci  
338 escape these resets, which can lead to transgenerational epigenetic inheritance [100].  
339 This occurs much less frequently in animals than in plants (e.g. in *Arabidopsis*,  
340 demethylation is largely restricted to asymmetric CHH methylation sites, and contrary to  
341 mouse, does not occur on most symmetric CG and CHG methylation sites) [100]. Although  
342 the  $2n \rightarrow n$  resetting occurs at or very close to meiosis in some cases (in female meiosis in  
343 animals), its timing may not be strictly tied to meiosis. For instance, it occurs pre-  
344 meiotically in the male germ line of animals (as shown in mice) or post-meiotically in male  
345 plant gametophytes (as shown in *Arabidopsis*) [100].

346

347 The evolutionary significance of these timing differences are poorly understood. Meiosis  
348 may simply not be the optimal time for epigenetic resetting. Many epigenetic pathways  
349 repress the activity of transposable elements (TEs), and so resetting epigenetic marks  
350 exposes the genome to mobilisation of these elements, which may be particularly  
351 detrimental when producing gametes. In addition, meiosis may be specifically vulnerable  
352 to TE activity for several reasons [101,102]. These include (i) deficient synapsis and  
353 repair due to the reshuffling of the meiotic machinery towards TE-induced DSBs; (ii)

354 ectopic recombination among TEs; and (iii) interference with synapsis due to TE  
355 transcriptional activity. Alternative TE silencing mechanisms, such as those involving  
356 small RNAs, may have evolved to ensure proper TE control during epigenetic resetting.  
357 For example, these mechanisms involve piRNA and/or endo-siRNA in mammal male and  
358 female germlines, respectively [103], and transfer of siRNA from the central cell to the  
359 egg cell in plant female gametophytes [104]. It is also possible that stringent synapsis  
360 checkpoints evolved, in part, to prevent the formation of defective gametes due to TE  
361 activity, along with other possible causes of meiotic errors.

362

### 363 3.3 Meiosis asymmetry

364 Symmetrical meiosis results in four viable gametes, whereas asymmetrical meiosis  
365 results in a single gamete. Symmetrical meiosis is ancestral and is found in male meiosis  
366 in animals, seed plants, 'homosporous' species (e.g. mosses, many ferns) and isogamous  
367 eukaryotes. Asymmetrical meiosis, on the other hand, has evolved multiple times, and  
368 occurs in female meiosis in animals, seed plants and some ciliates. The selective scenarios  
369 underlying the evolution of meiotic asymmetry are unresolved. In some cases, such as in  
370 ciliates, there is no requirement for four meiotic products, as sex occurs by the  
371 cytoplasmic exchange of haploid micronuclei ("conjugation"). In other cases,  
372 asymmetrical meiosis in females results in a large oocyte full of resources, which may  
373 favour the production of a single cell rather than four [66,105,106]. However, females  
374 could also achieve this symmetrically by undergoing fewer meioses. Therefore, it is  
375 possible that asymmetrical meiosis allows better control of resource allocation to oocytes,  
376 as symmetrical meiosis may not ensure an even distribution of resources across four  
377 meiocytes; one difficulty here is that it is not clear why female control of resource  
378 allocation would be more efficient among meiocytes derived from the same or different  
379 meiosis. A solution may be that meiocytes must compete for resources during meiosis, so  
380 that a symmetrical female meiosis is vulnerable to SGEs that bias resource allocation in  
381 their favour, possibly by killing other products of meiosis [106]. Asymmetrical meiosis  
382 may therefore have evolved to suppress such costly competition within tetrads [107], but  
383 as discussed in the next section, it also opens the possibility of new conflicts [106]. Hence,  
384 the evolution of asymmetrical female meiosis is a question that remains not entirely  
385 resolved.

386

### 387 3.4 Fairness of meiosis

388 A striking feature of meiosis is its apparent fairness: under Mendel's first law of  
389 inheritance, each allele has a 50% chance of ending up in any given gamete. However,

390 there are many SGEs that increase their chances above 50% by subverting the mechanism  
391 of meiosis. These SGEs fall into two classes. The first class is killer SGEs, which kill cells  
392 that have not inherited the element. In principle, such killers could operate during meiosis  
393 (the hypothetical 'sister killers' as discussed above), but the numerous killer SGEs that  
394 have been identified so far operate postmeiotically, e.g. by killing sibling sperm [108–  
395 111]. The second class consists of meiotic drivers that exploit the asymmetry of female  
396 meiosis discussed in the previous section. These elements achieve transmission in excess  
397 of 50% by preferentially moving into the meiotic products that will eventually become  
398 the eggs or megaspores [109,112]. There is a similarity between this kind of meiotic drive,  
399 where alleles preferentially go where resources are (i.e. the egg), and SGEs expressed  
400 later and biasing resource allocation in their favour [113]. Parents make decisions of  
401 allocations to offspring before the "meiotic veil of ignorance", whereas offspring compete  
402 for resources "from behind the veil" [114,115]. These genetic conflicts (between parent  
403 and offspring and between paternally and maternally derived alleles) are likely at the  
404 origin of parental imprints that differentially occur at male and female meiosis on some  
405 genes controlling embryo growth [114].

406

407 SGEs that undermine the fairness of meiosis provide explanations for otherwise puzzling  
408 observations. Perhaps most strikingly, centromere DNA regions often evolve rapidly, in  
409 contrast to what one would expect given their important and conserved function in  
410 meiosis. Henikoff *et al.* [116] therefore proposed that expansion of repeat sequences in  
411 centromeric DNA produces a "stronger" centromere, with increased kinetochore binding,  
412 which exhibits drive towards the future egg during meiosis I and consequently spreads in  
413 the population. Some of the best support for this hypothesis comes from a female meiotic  
414 driver in the monkeyflower *Mimulus guttatus* [117]. Although conclusive evidence for a  
415 direct centromere function of this element is lacking, it is physically associated with large  
416 centromere-specific satellite DNA arrays [118]. Female meiotic drive may also explain  
417 rapid karyotype evolution and the distribution of meta- vs. acrocentric chromosomes  
418 [112] because Robertsonian fusion chromosomes (fusions of two acrocentric  
419 chromosomes into one metacentric) can behave like meiotic drivers and segregate  
420 preferentially into the future egg during meiosis I [119].

421

422 Other features of meiosis may be adaptations to suppress killer or meiotic drive SGEs.  
423 Such adaptations are expected, because these elements are generally costly for the rest of  
424 the genome [e.g. 108,120]. Defence against killer elements can be achieved by limiting  
425 gene expression. Accordingly, meiotic sex chromosome inactivation (MSCI, starting at

426 pachytene of prophase I, see Fig. 1) has been proposed to have evolved to control sex  
427 chromosome meiotic drive elements [121], and more generally this same principle may  
428 explain limited gene expression during meiosis and in its haploid products, as well as  
429 sharing of RNA and proteins among these cells. There is also evidence for rapid evolution  
430 and positive selection in the DNA-binding regions of centromere-associated proteins,  
431 which accords with the expectation of selection for countermeasures to limit preferential  
432 segregation of centromere drive elements towards the egg [106,116]. The evolution of  
433 holokinetic chromosomes may be an extreme form of defence against centromere drive  
434 [106].

435

#### 436 4. Meiosis and recombination

437 A ubiquitous feature of meiosis is the exchange of genetic material between homologous  
438 chromosomes. Whilst we have discussed arguments on its origin (see section 1.2), the  
439 maintenance of recombination is even more debated [122–124]. Here, we do not review  
440 this question, but discuss the evolutionary significance of patterns of recombination  
441 variation within and across species, as these present many mysteries connected to the  
442 functioning of meiosis.

443

##### 444 4.1 The number of crossovers per chromosome: constrained or not?

445 In many species, the number of COs per bivalent appears to follow highly constrained  
446 patterns, showing little variation compared to the variation of chromosome sizes,  
447 themselves spanning several orders of magnitude [125]. Within species, the correlation  
448 between genetic map length (in cM, with 50 cM being equivalent to 1 CO per bivalent) and  
449 physical length (in megabases, Mb) per chromosome is very strong ( $R^2 > 0.95$ ) [126–131],  
450 and often has an intercept of  $\sim 50$  cM, consistent with occurrence of one obligate CO per  
451 bivalent. There is direct evidence indicating that bivalents lacking a CO have an increased  
452 probability of non-disjunction, resulting in unviable or unfit aneuploid offspring  
453 [132,133]. Indeed, COs establish physical connections between homologues, promoting  
454 accurate disjunction by providing the tension needed for the bipolar spindle to establish  
455 [134–136]. Therefore, this constraint has likely led to the evolution of regulation of CO  
456 numbers per bivalent across the eukaryotes [137,138]. However, the reasons underlying  
457 the evolutionary persistence of this constraint are not well understood. In several species  
458 [e.g., *Arabidopsis*, 139], the intercept is less than 50cM, but the smallest chromosome is at  
459 least 50cM, thus still consistent with one obligate CO. More decisively, many species are  
460 achiasmate (i.e. have an absence of recombination) in one sex [140], with alternative

461 mechanisms to ensure proper disjunction of achiasmate bivalents [141,142]. This  
462 indicates that COs are not always obligatory and are maintained for reasons other than  
463 ensuring proper disjunction.

464

465 In addition to the obligate CO, additional CO events can occur within bivalents. The strong  
466 cM-Mb relationship within species indicates that the number of surplus COs correlates  
467 strongly with physical chromosome size (see above). However, the rate at which surplus  
468 COs are added per Mb (i.e. the slope of the correlation) varies strongly between species  
469 [125,131,143]. This may be partly explained by selection for different CO rates in different  
470 species [144–146]. The strong correlations observed within most species may be  
471 explained by variation in trans-acting factors, such as the locus *RNF212* and its protein,  
472 which affects the propensity for DSBs to form surplus COs [147,148]; indeed, the  
473 identification of loci affecting variation in CO rates indicates the potential for rapid  
474 evolution of CO rates within and between species [149].

475

476 A further constraint on bivalent disjunction may exist: the separation of different  
477 bivalents on the meiotic spindle may need to be collectively synchronised to avoid  
478 aneuploidy. If the number of COs correlates with the amount of tension exerted on the  
479 homologues, then a tight control of excess COs may minimise disjunction asynchrony.  
480 This hypothesis may explain the observation that some disjunction problems in humans  
481 occur in a global manner without involving effects driven by specific chromosomes [150–  
482 152]. Generally high CO numbers are, on the other hand, not necessarily problematic with  
483 respect to proper disjunction [153,154].

484

#### 485 4.2 Crossover interference

486 A CO in one position may strongly reduce the likelihood of another CO occurring in the  
487 vicinity and/or on the same bivalent. This ‘crossover interference’ is widespread  
488 [125,153,155,156], but its function and mechanistic basis remains largely unknown. In  
489 many species, two classes of COs have been identified: Class I COs, which are sensitive to  
490 interference; and Class II COs, which are not [157]. Class I COs are thought to play a major  
491 role in ensuring obligate COs, and so interference may limit the frequency or variance of  
492 COs, which may be important in ensuring proper disjunction [158]. For instance, as with  
493 autopolyploids (see above), increased interference may limit the number of CO to just one  
494 per chromosome, preventing aberrant multivalent segregation [54]. A variant of this idea  
495 is that interference is a mechanism to avoid COs occurring in close proximity, which might

496 reduce cohesion between homologues [159] or slip and cancel each other out when they  
497 involve 2 or 4 non-interlocking chromatids, resulting in no CO occurring [160]; however,  
498 these mechanisms do not explain long-distance interference. A further suggestion is that  
499 CO interference may be adaptive by breaking up genetic associations. First, adjacent COs  
500 may be avoided because they cancel their effects on genetic associations [161]. Second, it  
501 has been speculated that CO interference may reduce the chances of breaking up co-  
502 adapted gene complexes (supergenes) [162]. Some support for the idea that CO  
503 interference is not a purely mechanistic constraint comes from the fact that some species  
504 lack interference [155] and, more importantly, that there is some evidence suggesting  
505 that interference levels evolve in long-term evolution experiments in *Drosophila* [163].

506

#### 507 4.3 Differences in recombination rates between the sexes

508 In many species, CO rates and localisation differ between male and female meioses, and  
509 these differences can vary in degree and direction even between closely related species  
510 [164–166]. The most extreme case is achiasmy, an absence of recombination in one sex,  
511 nearly always the heterogametic sex [164]. This may have evolved either as a side effect  
512 of selection to suppress recombination between the sex chromosomes [167,168], or as a  
513 way to promote tight linkage without suppressing recombination on the X or Z  
514 chromosomes [165]. More intriguing are the quantitative differences between males and  
515 females, known as heterochiasmy, which are found in many taxa, but whose mechanistic  
516 and evolutionary drivers are not yet fully understood. A number of explanations have  
517 been proposed, relating to mechanistic factors such as differences in chromatin structure  
518 [169–171], sexual dimorphism in the action of loci associated with CO rate [e.g. *RNF212*,  
519 127,128,148], and evolutionarily widespread processes such as sperm competition,  
520 sexual dimorphism and dispersal [164,172,173]. Some models point to a role of sex  
521 differences in selection during the haploid phase [174]. Whilst a viable explanation in  
522 plants [165], there is little empirical support for this in animals [173], where meiosis in  
523 females is only completed after fertilisation (i.e. there is no true haploid phase), and  
524 where only few genes are expressed in sperm. However, meiotic drive systems are often  
525 entirely distinct between males and females [175] and may be a primary cause of haploid  
526 selection [176]. These systems often require genetic associations between two loci (a  
527 distorter and responder, or a distorter and a centromere in males and females,  
528 respectively). These driving elements might thus be very important in shaping  
529 heterochiasmy patterns [107]. Indeed, COs in female meiosis are located closer to  
530 centromeres, which would be consistent with the view that this localisation evolved to

531 limit centromeric drive [177] (see also section 3.4). Similarly, meiotic drive in favour of  
532 recombinant chromatids have been detected in human female meiosis [67], which may  
533 limit centromere drive.

534

#### 535 4.4 The localisation of COs and recombination hotspots

536 The localisation of recombination events differs between species. In many species,  
537 recombination occurs in localised regions known as “recombination hotspots” of around  
538 1-2kb in length [178–181], although some species (e.g., *C. elegans* and *Drosophila*) lack  
539 well-defined hotspots [182,183]. There are at least two types of hotspots (Fig. 3). The first  
540 type, probably ancestral, is found in fungi, plants, birds and some mammals; these  
541 hotspots are temporally stable (up to millions of years) and concentrated near promoter  
542 regions and transcription start sites [180,184–187]. The second type is likely derived, and  
543 is found in other mammals, including mice and humans, where the positioning of hotspots  
544 is determined by the zinc-finger protein PRDM9. This system differs in two respects from  
545 the former: first, it appears to direct DSBs away from regulatory regions [188], and  
546 second, mutations in the DNA-binding zinc-finger array change the sequence motif  
547 targeted by the protein, leading to rapid evolution of hotspot positions over short time-  
548 scales [189,190]. This system is not present in all mammals: in dogs, hotspots target  
549 promoter regions [191], and the knock-out of Prdm9 in mouse makes recombination  
550 target promoter regions instead, underlining its derived nature [188].

551

552 The evolutionary significance of both kinds of hotspots remains unclear. For the first type,  
553 the positions of hotspots may be caused by chromatin accessibility in transcribed regions,  
554 or, have evolved to favour recombination in gene rich regions (where it might be worth  
555 reducing genetic association). However, this does not clearly account for their precise  
556 location in regulatory regions. Another possibility might be that the co-occurrence of both  
557 COs and gene conversion events (i.e. where resolution of DSBs without CO is achieved by  
558 exchanging small segments of DNA) specifically in regulatory regions could repress  
559 enhancer runaway, a mechanism that can lead to suboptimal expression levels [192]. The  
560 evolutionary significance of the second kind of hotspot is similarly elusive. These hotspots  
561 are self-destructing because the target sequence motifs are eroded by biased gene  
562 conversion (BGC) during DSB repair [193]. This leads to a “hotspot paradox”: how can  
563 hotspots and recombination be maintained in the long term in the face of BGC [194]? A  
564 possible solution is that trans-acting factors like PRDM9 may mutate sufficiently fast to  
565 constantly ‘chase’ new and frequent targets (hotspots), switching to new ones when these  
566 targets become rare due to BGC [195]. This ‘Red Queen’ model does not require strong



567 stabilising selection on the number of COs, and closely mimics the pattern of hotspot  
568 turnover observed in some cases [196]. However, this model does not explain how the  
569 second kind of hotspots evolved in the first place, as when it arose proper segregation  
570 was presumably already ensured by the first kind of hotspots (which, as seen in mice, are  
571 still active). Also, it does not explain why PRDM9 action is self-destructing: there is no  
572 necessity to induce DSBs exactly at the position of the target sequence for a trans-acting  
573 factor. In fact, there is no logical necessity to rely on a target sequence to maintain one CO  
574 per chromosome, as fixed chromosomal features could serve this purpose. It is worth  
575 noting here that recruiting promoter sequences for this purpose (as found for hotspots of  
576 the first kind) would be very efficient, as these sequences are highly stable and dispersed  
577 in the genome on all chromosomes. There is also no evidence so far that targeted binding  
578 motifs of PRDM9 correspond to some selfish genetic elements whose elimination would  
579 be beneficial. Overall, while spectacular progress has been made recently in elucidating  
580 hotspot mechanisms in detail (and patterns in recombination landscapes), there are still  
581 major gaps in our understanding of their evolutionary significance.

582

## 583 5 Conclusions

584 The evolutionary significance of meiosis has often been interpreted in an oversimplified  
585 manner, restricted mainly to the direct (DSB repair, proper disjunction) or indirect  
586 (genetic associations) effects of meiotic recombination. Yet, many features of meiosis are  
587 unlikely to be explained by effects of recombination alone, and the fields of cellular and  
588 molecular biology are uncovering new meiotic features at high rate. One of the main take-  
589 home messages of this review is that many, if not most features of meiosis are still  
590 awaiting an evolutionary explanation. Nonetheless, the recent advances in all detailed  
591 aspects of meiosis now offer the chance to investigate these questions in a far more  
592 comprehensive manner. This will require continued dialogue between cell, molecular,  
593 and evolutionary biologists [as advocated e.g. in 197], and perhaps also the realisation  
594 that similarities between features may in fact have different evolutionary explanations  
595 (e.g., different kinds of hotspots).

596 One of the most salient themes in most meiosis mysteries is the impact of genetic conflicts  
597 and SGEs. As for the evolution of genome size and structure, their impact is probably  
598 central [198], but in many cases, they remain hypothetical and difficult to demonstrate  
599 and study directly: many SGEs reach fixation quickly and leave almost no visible footprint.  
600 Showing that some meiotic features evolved to control SGEs represents an even greater  
601 challenge. Indeed, if successful, such features would prevent these SGEs to spread, further

602 limiting their detection. In addition, demonstrating a role in SGEs control requires to rule  
603 out that these features evolved for more mechanistic and simpler alternatives. This is  
604 usually extremely difficult, as many *ad hoc* mechanistic constraints can be imagined.

605 Although meiosis is highly conserved in eukaryotes, deviations from the norm are  
606 ubiquitous and may provide important insights into its evolution. This is already apparent  
607 when considering model organisms (e.g., point centromeres in yeast, achiasmy in male  
608 *Drosophila*, holokinetic chromosomes in *C. elegans*, fast evolving recombination hotspots  
609 in mice and humans). However, the true diversity of meiotic features is likely to be  
610 revealed only when considering non-model organisms, and unicellular eukaryotes appear  
611 especially promising in this respect. Obtaining a clearer understanding of the  
612 evolutionary significance of the myriad of meiotic features will certainly be crucial to  
613 inspire and guide mechanistic investigations. Conversely, as often, "*all theory is grey, but*  
614 *green is the tree of life*" [Goethe, Faust Part I], and the mysteries of meiosis call for new  
615 developments of evolutionary theory, to make it less grey and more closely connected to  
616 the biological details. Overall, all these mysteries tend to have been overshadowed by the  
617 famous question of the maintenance of sex. However, resolving them might provide  
618 decisive steps towards solving this major question of evolutionary biology.

619

## 620 Authors' Contributions

621 T.L. conceived and co-ordinated the review. All authors contributed to and approved this  
622 manuscript.

## 623 Competing Interests

624 We have no competing interests.

## 625 Acknowledgement

626 We thank M. Archetti, K. Bomblies, D. Charlesworth, B. de Massy, L. Duret, E. Jenczewski,  
627 R. Mercier, P. van Dijk and J. Wilkins for comments on this manuscript. Our intention was  
628 to cover all meiosis-related evolutionary mysteries in a single perspective. We apologise  
629 to all authors of the many interesting and relevant papers we were unable to cite in the  
630 final condensed version.

## 631 References

- 632 1. Maynard Smith, J. 1978 *The evolution of sex*.  
633 2. Hamilton, W. D. 2001 *Narrow roads of gene land: Volume 2: Evolution of sex*. Oxford: Oxford Univ. Press.  
634 3. Knoll, a H., Javaux, E. J., Hewitt, D. & Cohen, P. 2006 Eukaryotic organisms in Proterozoic oceans. *Philos. Trans. R.*  
635 *Soc. Lond. B. Biol. Sci.* **361**, 1023-1038.

- 636 4. Douzery, E. J. P., Snell, E. a, Baptiste, E., Delsuc, F. & Philippe, H. 2004 The timing of eukaryotic evolution: does a  
637 relaxed molecular clock reconcile proteins and fossils? *Proc. Natl. Acad. Sci. U. S. A.* **101**, 15386-15391.
- 638 5. Cavalier-Smith, T. 2002 Origins of the machinery of recombination and sex. *Heredity* **88**, 125-141.
- 639 6. Ramesh, M., Malik, S.-B. & Logsdon, J. J. 2005 A Phylogenomic Inventory of Meiotic Genes: Evidence for Sex in  
640 Giardia and an Early Eukaryotic Origin of Meiosis. *Curr. Biol.* **15**, 185-191.
- 641 7. Speijer, D., Lukeš, J. & Eliáš, M. 2015 Sex is a ubiquitous, ancient, and inherent attribute of eukaryotic life. *Proc. Natl.*  
642 *Acad. Sci. U. S. A.* **112**, 8827-34.
- 643 8. Cleveland, L. 1947 The origin and evolution of meiosis. *Sci* **105**, 287-289.
- 644 9. Wilkins, A. S. & Holliday, R. 2009 The evolution of meiosis from mitosis. *Genetics* **181**, 3-12.
- 645 10. Hurst, L. & Nurse, P. 1991 A note on the evolution of meiosis. *J. Theor. Biol.*
- 646 11. Margulis, L. & Sagan, D. 1990 *Origins of Sex: Three Billion Years of Genetic Recombination*. Yale University Press.
- 647 12. Maynard Smith, J. & Szathmary, E. 1995 *The Major Transitions in Evolution*. Oxford: Oxford Univ. Press.
- 648 13. Mable, B. K. & Otto, S. P. 1998 The evolution of life cycles with haploid and diploid phases. *BioEssays* **20**, 453-462.
- 649 14. Rescan, M., Lenormand, T. & Roze, D. 2016 Interactions between genetic and ecological effects on the evolution of life  
650 cycles. *Am. Nat.* **187**, 19-34.
- 651 15. Souza-Júnior, S. A., Becker, T. C. A. & Castro-Prado, M. A. A. 2007 Asexual recombination in a uvsH mutant of  
652 aspergillus nidulans. *Biol. Res.* **40**, 65-71.
- 653 16. Parfrey, L. W., Lahr, D. J. G. & Katz, L. A. 2008 The dynamic nature of eukaryotic genomes. *Mol. Biol. Evol.* **25**, 787-  
654 794.
- 655 17. Otto, S. P. & Goldstein, D. B. 1992 Recombination and the evolution of diploidy. *Genetics* **131**, 745-751.
- 656 18. Hickey, D. A. & Rose, M. R. 1988 The role of gene transfer in the evolution of eukaryotic sex. In *The evolution of sex*  
657 (eds M. RE & L. BR), pp. 161-175. Sunderland, MA: Sinauer Associates.
- 658 19. Rusche, L. N. & Rine, J. 2010 Switching the mechanism of mating type switching: A domesticated transposase supplants  
659 a domesticated homing endonuclease. *Genes Dev.* **24**, 10-14.
- 660 20. Zickler, D. & Kleckner, N. 2015 Recombination, Pairing, and Synapsis of Homologs during Meiosis. *Cold Spring Harb*  
661 *Perspect Biol* **7**, a016626.
- 662 21. Obeso, D., Pezza, R. & Dawson, D. 2014 Couples, Pairs, and Clusters: Mechanisms and Implications of Centromere  
663 Associations in Meiosis. *Chromosoma* **123**, 43-55.
- 664 22. Kleckner, N. 1996 Meiosis: How could it work? *Proc. Natl. Acad. Sci. U. S. A.* **93**, 8167-8174.
- 665 23. Baudat, F., Imai, Y. & de Massy, B. 2013 Meiotic recombination in mammals: localization and regulation. *Nat. Rev.*  
666 *Genet.* **14**, 794-806.
- 667 24. Birdsall, J. & Wills, C. 2003 The evolutionary origin and maintenance of sexual recombination: a review of contemporary  
668 models. In *Evolutionary Biology* (eds R. MacIntyre & M. Clegg), pp. 27-138. Kluwer Academic/Plenum Publishers.
- 669 25. Marcon, E. & Moens, P. B. 2005 The evolution of meiosis: Recruitment and modification of somatic DNA-repair  
670 proteins. *BioEssays* **27**, 795-808.
- 671 26. White, M. F. 2011 Homologous recombination in the archaea: the means justify the ends. *Biochem. Soc. Trans.* **39**, 15-  
672 9.
- 673 27. Heng, H. H. Q. 2007 Elimination of altered karyotypes by sexual reproduction preserves species identity. *Genome* **50**,  
674 517-24.
- 675 28. Sasaki, M., Lange, J. & Keeney, S. 2010 Genome destabilization by homologous recombination in the germ line. *Nat.*  
676 *Rev. Mol. Cell Biol.* **11**, 182-95.
- 677 29. Arkhipova, I. & Meselson, M. 2005 Deleterious transposable elements and the extinction of asexuals. *BioEssays* **27**, 76-  
678 85.
- 679 30. Archetti, M. 2003 A selfish origin for recombination. *J. Theor. Biol.* **223**, 335-346.
- 680 31. Bernstein, H., Hopf, F. A. & Michod, R. E. 1988 Is meiotic recombination and adaptation for repairing DNA, producing  
681 genetic variation, or both? In *The evolution of sex* (eds R. E. Michod & B. R. Levin), pp. 139-160. Sunderland, MA:  
682 Sinauer.
- 683 32. Bernstein, H., Bernstein, C. & Michod, R. E. 2011 Meiosis as an Evolutionary Adaptation for DNA Repair. *Meiosis as*  
684 *an Evol. Adapt. DNA Repair*, 357-382.
- 685 33. Hörandl, E. & Hadacek, F. 2013 The oxidative damage initiation hypothesis for meiosis. *Plant Reprod.* **26**, 351-367.
- 686 34. Maynard-Smith, J. 1988 The evolution of recombination. In *The evolution of sex* (eds R. E. Michod & B. R. Levin), pp.  
687 106-125. Sunderland, MA: Sinauer associates.
- 688 35. Hurst, L. D. 1993 Drunken walk of the diploid. *Nature* **365**, 206-207.
- 689 36. Archetti, M. 2004 Loss of complementation and the logic of two-step meiosis. *J. Evol. Biol.* **17**, 1084-1097.
- 690 37. Haig, D. & Grafen, A. 1991 Genetic scrambling as a defence against meiotic drive. *J. theor. Biol.* **153**, 531-558.
- 691 38. Haig, D. 1993 Alternatives to meiosis: the unusual genetics of red algae, microsporidia, and others. *J. theor. Biol.* **163**,  
692 15-31.
- 693 39. Hurst, L. D. & Randerson, J. P. 2000 Transitions in the evolution of meiosis. *J. Evol. Biol.* **13**, 466-479.
- 694 40. Wijnker, E. & Schnittger, A. 2013 Control of the meiotic cell division program in plants. *Plant Reprod.* **26**, 143-58.
- 695 41. Raikov, I. B. 1982 *The protozoan nucleus -- morphology and evolution*. Vienna: Springer-Verlag.
- 696 42. Raikov, I. B. 1995 Meiosis in protists: Recent advances and persisting problems. *Eur. J. Protistol.* **31**, 1-7.
- 697 43. Grandont, L., Jenczewski, E. & Lloyd, A. 2013 Meiosis and its Deviations in Polyploids. *Cytogenet. Genome Res.* **140**,  
698 171-184.
- 699 44. Stenberg, P. & Saura, A. 2013 Meiosis and its deviations in polyploid animals. *Cytogenet. Genome Res.* **140**, 185-203.
- 700 45. Lloyd, A. & Bomblies, K. 2016 Meiosis in autopolyploid and allopolyploid Arabidopsis. *Curr. Opin. Plant Biol.* **30**,  
701 116-122.
- 702 46. Madlung, A., Tyagi, A. P., Watson, B., Jiang, H., Kagochi, T., Doerge, R. W., Martienssen, R. & Comai, L. 2005  
703 Genomic changes in synthetic Arabidopsis polyploids. *Plant J.* **41**, 221-230.
- 704 47. Gaeta, R. T., Pires, J. C., Iniguez-Luy, F., Leon, E. & Osborn, T. C. 2007 Genomic changes in resynthesized Brassica  
705 napus and their effect on gene expression and phenotype. *Plant Cell* **19**, 3403-3417.

- 706 48. Wang, Y., Jha, A. K., Chen, R., Doonan, J. H. & Yang, M. 2010 Polyploidy-associated genomic instability in *Arabidopsis*  
707 *thaliana*. *Genesis* **48**, 254-263.
- 708 49. Gaeta, R. T. & Chris Pires, J. 2010 Homoeologous recombination in allopolyploids: The polyploid ratchet. *New Phytol.*  
709 **186**, 18-28.
- 710 50. Santos, J. L., Alfaro, D., Sanchez-Moran, E., Armstrong, S. J., Franklin, F. C. H. & Jones, G. H. 2003 Partial  
711 Diploidization of Meiosis in Autotetraploid *Arabidopsis thaliana*. *Genetics* **165**, 1533-1540.
- 712 51. Yant, L., Hollister, J. D., Wright, K. M., Arnold, B. J., Higgins, J. D., Franklin, F. C. H. & Bomblies, K. 2013 Meiotic  
713 Adaptation to Genome Duplication in *Arabidopsis arenosa*. *Curr. Biol.* **23**, 2151-2156.
- 714 52. Cifuentes, M., Grandont, L., Moore, G., Chèvre, A. M. & Jenczewski, E. 2010 Genetic regulation of meiosis in polyploid  
715 species: New insights into an old question. *New Phytol.* **186**, 29-36.
- 716 53. Le Comber, S. C., Ainouche, M. L., Kovarik, A. & Leitch, A. R. 2010 Making a functional diploid: From polysomic to  
717 disomic inheritance. *New Phytol.* **186**, 113-122.
- 718 54. Bomblies, K., Jones, G., Franklin, C., Zickler, D. & Kleckner, N. 2016 The challenge of evolving stable polyploidy:  
719 could an increase in 'crossover interference distance' play a central role? *Chromosoma* **125**, 287-300.
- 720 55. Hollister, J. D., Arnold, B. J., Svedin, E., Xue, K. S., Dilkes, B. P. & Bomblies, K. 2012 Genetic Adaptation Associated  
721 with Genome-Doubling in Autotetraploid *Arabidopsis arenosa*. *PLoS Genet.* **8**.
- 722 56. Griffiths, S., Sharp, R., Foote, T. N., Bertin, I., Wanous, M., Reader, S., Colas, I. & Moore, G. 2006 Molecular  
723 characterization of Ph1 as a major chromosome pairing locus in polyploid wheat. *Nature* **439**, 749-52.
- 724 57. St Charles, J., Hamilton, M. L. & Petes, T. D. 2010 Meiotic chromosome segregation in triploid strains of *Saccharomyces*  
725 *cerevisiae*. *Genetics* **186**, 537-550.
- 726 58. Lim, K. Y. et al. 2005 Evolutionary implications of permanent odd polyploidy in the stable sexual, pentaploid of *Rosa*  
727 *canina* L. *Heredity* **94**, 501-506.
- 728 59. Pazy, B. & Plitmann, U. 1991 Unusual chromosome separation in meiosis of *Cuscuta* L. *Genome* **10**, 533-536.
- 729 60. Heckmann, S., Jankowska, M., Schubert, V., Kumke, K., Ma, W. & Houben, A. 2014 Alternative meiotic chromatid  
730 segregation in the holocentric plant *Luzula elegans*. *Nat. Commun.* **5**, 4979.
- 731 61. Cabral, G., Marques, A., Schubert, V., Pedrosa-Harand, A. & Schlägelhofer, P. 2014 Chiasmatic and achiasmatic  
732 inverted meiosis of plants with holocentric chromosomes. *Nat. Commun.* **5**, 5070.
- 733 62. Wrensch, D. L., Kethley, J. & Norton, R. A. 1994 Cytogenetics of Holokinetic Chromosomes and Inverted Meiosis :  
734 Keys to the Evolutionary Success of Mites , with Generalizations on Eukaryotes. *Mites Ecol. Evol. Anal. Life-History*  
735 *Patterns* , 282-343.
- 736 63. John, B. 1990 *Meiosis*. Cambridge: Cambridge University Press.
- 737 64. Bongiorno, S., Fiorenzo, P., Pippoletti, D. & Pranterà, G. 2004 Inverted meiosis and meiotic drive in mealybugs.  
738 *Chromosoma* **112**, 331-341.
- 739 65. Melters, D. P., Paliulis, L. V., Korf, I. F. & Chan, S. W. L. 2012 Holocentric chromosomes: Convergent evolution,  
740 meiotic adaptations, and genomic analysis. *Chromosom. Res.* **20**, 579-593.
- 741 66. Mira, a 1998 Why is meiosis arrested? *J. Theor. Biol.* **194**, 275-87.
- 742 67. Ottolini, C. S. et al. 2015 Genome-wide maps of recombination and chromosome segregation in human oocytes and  
743 embryos show selection for maternal recombination rates. *Nat. Genet.* **47**, 727-735.
- 744 68. Mogie, M. 1986 Automixis: its distribution and status. *Biol. J. Linn. Soc.* **28**, 321-329.
- 745 69. Suomalainen, E., Saura, A. & Lokki, J. 1987 *Cytology and evolution in parthenogenesis*. Boca Raton FL: CRC Press.
- 746 70. Stenberg, P. & Saura, A. 2009 Cytology of Asexual Animals. In *Lost sex. The evolutionary biology of parthenogenesis*  
747 (eds I. Schön K. Martens & P. van Dijk), pp. 63-74. Dordrecht, The Netherlands: Springer Science.
- 748 71. Archetti, M. 2010 Complementation, genetic conflict, and the evolution of sex and recombination. *J. Hered.* **101**, 1-13.
- 749 72. Neiman, M. & Schwander, T. 2011 Using Parthenogenetic Lineages to Identify Advantages of Sex. *Evol. Biol.* **38**, 115-  
750 123.
- 751 73. Nougé, O., Rode, N., Zahab, R., Ségard, A., Chevin, L.-M., Haag, C. R. & Lenormand, T. 2015 Automixis in *Artemia*:  
752 solving a century-old problem. *J. Evol. Biol.* **In press**.
- 753 74. van Dijk, P. J. 2009 Apomixis: Basics for non-botanists. In *Lost sex. The evolutionary biology of parthenogenesis* (eds  
754 I. Schön K. Martens & P. J. van Dijk), pp. 47-62. Dordrecht, The Netherlands: Springer Science.
- 755 75. Asher, J. H. 1970 Parthenogenesis and genetic variability. II. One-locus models for various diploid populations. *Genetics*  
756 **66**, 369-391.
- 757 76. Percy, M., Hardy, O. & Aron, S. 2006 Thelytokous parthenogenesis and its consequences on inbreeding in an ant.  
758 *Heredity* **96**, 377-382.
- 759 77. Engelstädter, J., Sandrock, C. & Vorburger, C. 2011 Contagious parthenogenesis, automixis, and a sex determination  
760 meltdown. *Evolution* **65**, 501-511.
- 761 78. Engelstädter, J. 2008 Constraints on the evolution of asexual reproduction. *BioEssays* **30**, 1138-1150.
- 762 79. Svendsen, N. et al. 2015 Uncovering cryptic asexuality in *Daphnia magna* by RAD-sequencing. *Genetics* **201**, 1143-1155.
- 763 80. Archetti, M. 2004 Recombination and loss of complementation: a more than two-fold cost for parthenogenesis. *J. Evol.*  
764 *Biol.* **17**, 1084-1097.
- 765 81. Schwander, T. & Crespi, B. J. 2009 Multiple direct transitions from sexual reproduction to apomictic parthenogenesis in  
766 *Timema* stick insects. *Evolution* **63**, 84-103.
- 767 82. Baudry, E., Kryger, P., Allsopp, M., Koeniger, N., Vautrin, D., Mougé, F., Cornuet, J.-M. & Solignac, M. 2004 Whole-  
768 genome scan in thelytokous-laying workers of the Cape honeybee (*Apis mellifera capensis*): Central fusion, reduced  
769 recombination rates and centromere mapping using half-tetrad analysis. *Genetics* **167**, 243-252.
- 770 83. Lutes, A. a, Neaves, W. B., Baumann, D. P., Wiegraebe, W. & Baumann, P. 2010 Sister chromosome pairing maintains  
771 heterozygosity in parthenogenetic lizards. *Nature* **464**, 283-286.
- 772 84. Bell, G. 1982 The Masterpiece of Nature: the Evolution and Genetics of Sexuality.
- 773 85. Neiman, M., Sharbel, T. F. & Schwander, T. 2014 Genetic causes of transitions from sexual reproduction to asexuality  
774 in plants and animals. *J. Evol. Biol.* **27**, 1346-59.
- 775 86. Hiruta, C., Nishida, C. & Tochinal, S. 2010 Abortive meiosis in the oogenesis of parthenogenetic *Daphnia pulex*.  
776 *Chromosom. Res.* **18**, 833-840.

- 777 87. Miura, T., Braendle, C., Shingleton, A., Sisk, G., Kambhampati, S. & Stern, D. L. 2003 A comparison of parthenogenetic  
778 and sexual embryogenesis of the pea aphid *Acyrtosiphon pisum* (Hemiptera: Aphidoidea). *J. Exp. Zool. B. Mol. Dev.*  
779 *Evol.* **295**, 59-81.
- 780 88. van Baarlen, P., van Dijk, P. J., Hoekstra, R. F. & de Jong, J. H. 2000 Meiotic recombination in sexual diploid and  
781 apomictic triploid dandelions (*Taraxacum officinale* L.). *Genome* **43**, 827-835.
- 782 89. Nunney, L. 1989 The maintenance of sex by group selection. *Evolution* **43**, 245-257.
- 783 90. Simon, J.-C., Rispe, C. & Sunnucks, P. 2002 Ecology and evolution of sex in aphids. *Trends Ecol. Evol.* **17**, 34-39.
- 784 91. Schwander, T., Vuilleumier, S., Dubman, J. & Crespi, B. J. 2010 Positive feedback in the transition from sexual  
785 reproduction to parthenogenesis. *Proc. Biol. Sci.* **277**, 1435-42.
- 786 92. Marimuthu, M. P. A. et al. 2011 Synthetic clonal reproduction through seeds. *Science* **331**, 876.
- 787 93. D' Erfurth, I., Jolivet, S., Froger, N., Catrice, O., Novatchkova, M. & Mercier, R. 2009 Turning meiosis into mitosis.  
788 *PLoS Biol.* **7**.
- 789 94. Ravi, M., Marimuthu, M. P. a & Siddiqi, I. 2008 Gamete formation without meiosis in Arabidopsis. *Nature* **451**, 1121-  
790 1124.
- 791 95. Masui, Y. 2000 The elusive cytostatic factor in the animal egg. *Nat. Rev. Mol. Cell Biol.* **1**, 228-32.
- 792 96. Kishimoto, T. 2003 Cell-cycle control during meiotic maturation. *Curr. Opin. Cell Biol.* **15**, 654-663.
- 793 97. Extavour, C. 2009 Oogenesis: Making the Mos of Meiosis. *Curr. Biol.* **19**, R489-R491.
- 794 98. Sagata, N. 1996 Meiotic metaphase arrest in animal oocytes: Its mechanisms and biological significance. *Trends Cell*  
795 *Biol.* **6**, 22-28.
- 796 99. Gorelick, R. & Carpinone, J. 2009 Origin and maintenance of sex: The evolutionary joys of self sex. *Biol. J. Linn. Soc.*  
797 **98**, 707-728.
- 798 100. Heard, E. & Martienssen, R. A. 2014 Transgenerational epigenetic inheritance: Myths and mechanisms. *Cell* **157**, 95-  
799 109.
- 800 101. Zamudio, N., Barau, J., Teissandier, A., Walter, M., Borsos, M., Servant, N. & Bourc' his, D. 2015 DNA methylation  
801 restrains transposons from adopting a chromatin signature permissive for meiotic recombination. *Genes Dev.* **29**, 1256-  
802 70.
- 803 102. Soper, S. F. C., Heijden, G. W. Van Der, Hardiman, T. C., Martin, S. L., Boer, P. De & Bortvin, A. 2008 Mouse  
804 Maelstrom, a component of nuage, is essential for spermatogenesis and transposon repression in meiosis. *Dev. Cell.* **15**,  
805 285-297.
- 806 103. Claycomb, J. M. 2014 Ancient endo-siRNA pathways reveal new tricks. *Curr. Biol.* **24**, R703-R715.
- 807 104. Castel, E. & Martienssen, R. 2013 RNA interference (RNAi) in the Nucleus: roles for small RNA in transcription,  
808 epigenetics and beyond. *Nat. Rev. Genet.* **14**, 100-112.
- 809 105. Schuh, M. & Ellenberg, J. 2008 A New Model for Asymmetric Spindle Positioning in Mouse Oocytes. *Curr. Biol.* **18**,  
810 1986-1992.
- 811 106. Malik, H. S. & Henikoff, S. 2009 Major Evolutionary Transitions in Centromere Complexity. *Cell* **138**, 1067-1082.
- 812 107. Haig, D. 2010 Games in tetrads: segregation, recombination, and meiotic drive. *Am. Nat.* **176**, 404-413.
- 813 108. Jaenike, J. 2001 Sex chromosome meiotic drive. *Annu. Rev. Ecol. Syst.* **32**, 25-49.
- 814 109. Burt, A. & Trivers, R. 2006 *Genes in Conflict: The Biology of Selfish Genetic Elements*. Boston: Harvard University  
815 Press.
- 816 110. Larracunte, A. M. & Presgraves, D. C. 2012 The selfish Segregation Distorter gene complex of *Drosophila*  
817 *melanogaster*. *Genetics* **192**, 33-53.
- 818 111. Lindholm, A. K. et al. 2016 The ecology and evolutionary dynamics of meiotic drive. *Trends Ecol. Evol.* **31**, 315-326.
- 819 112. Pardo-Manuel De Villena, F. & Sapienza, C. 2001 Nonrandom segregation during meiosis: The unfairness of females.  
820 *Mamm. Genome* **12**, 331-339.
- 821 113. Haig, D. 1996 Gestational drive and the green-bearded placenta. *Proc. Natl. Acad. Sci. U. S. A.* **93**, 6547-6551.
- 822 114. Haig, D. 2014 Coadaptation and conflict, misconception and muddle, in the evolution of genomic imprinting. *Heredity*  
823 **113**, 96-103.
- 824 115. Okasha, S. 2012 Social Justice, Genomic Justice and the Veil of Ignorance: Harsanyi Meets Mendel. *Econ. Philos.* **28**,  
825 43-71.
- 826 116. Henikoff, S., Ahmad, K. & Malik, H. S. 2001 The centromere paradox: Stable inheritance with rapidly evolving DNA.  
827 *Science* **293**, 1098-1102.
- 828 117. Fishman, L. 2013 Female meiotic drive in monkeyflowers: insight into the population genetics of selfish centromeres.  
829 In *Plant Centromere Biology* (eds J. Jiang & J. A. Birchler), pp. 129-145. Oxford, UK: Wiley-Blackwell.
- 830 118. Fishman, L. & Saunders, A. 2008 Centromere-associated female meiotic drive entails male fitness costs in  
831 monkeyflowers. *Science* **322**, 1559-1562.
- 832 119. Chmátal, L., Gabriel, S. I., Mitsainas, G. P., Martínez-Vargas, J., Ventura, J., Searle, J. B., Schultz, R. M. & Lampson,  
833 M. A. 2014 Centromere strength provides the cell biological basis for meiotic drive and karyotype evolution in mice.  
834 *Curr. Biol.* **24**, 2295-300.
- 835 120. Fishman, L. & Kelly, J. K. 2015 Centromere-associated meiotic drive and female fitness variation in *Mimulus*. *Evolution*  
836 **69**, 1208-1218.
- 837 121. Tao, Y., Araripe, L., Kingan, S. B., Ke, Y., Xiao, H. & Hartl, D. L. 2007 A sex-ratio meiotic drive system in *Drosophila*  
838 *simulans*. II: An X-linked distorter. *PLoS Biol.* **5**, 2576-2588.
- 839 122. Barton, N. H. & Charlesworth, B. 1998 Why sex and recombination? *Science* **281**, 1986-1990.
- 840 123. Otto, S. P. & Lenormand, T. 2002 Resolving the paradox of sex and recombination. *Nat. Rev. Genet.* **3**, 252-261.
- 841 124. Otto, S. P. 2009 The Evolutionary Enigma of Sex. *Am. Nat.* **174**, S1-S14.
- 842 125. Mercier, R., Mézard, C., Jenczewski, E., Macaisne, N. & Grelon, M. 2015 The Molecular Biology of Meiosis in Plants.  
843 *Annu. Rev. Plant Biol.* **66**, 141210140145001-.
- 844 126. Kong, X., Murphy, K., Raj, T., He, C., White, P. S. & Matisse, T. C. 2004 A combined linkage-physical map of the human  
845 genome. *Am. J. Hum. Genet.* **75**, 1143-1148.
- 846 127. Johnston, S. E., Berenos, C., Slate, J. & Pemberton, J. M. 2016 Conserved Genetic Architecture Underlying Individual

- 847 Recombination Rate Variation in a Wild Population of Soay sheep (*Ovis aries*). *Genetics*, 1-47.  
848  
849 128. Ma, L. et al. 2015 Cattle Sex-Specific Recombination and Genetic Control from a Large Pedigree Analysis. *PLoS Genet.*  
850 **11**, 1-24.  
851 129. Kawakami, T., Smeds, L., Backström, N., Husby, A., Qvarnström, A., Mugal, C. F., Olason, P. & Ellegren, H. 2014  
852 A high-density linkage map enables a second-generation collared flycatcher genome assembly and reveals the patterns  
853 of avian recombination rate variation and chromosomal evolution. *Mol. Ecol.* **23**, 4035-4058.  
854 130. Groenen, M. A. M. et al. 2009 A high-density SNP-based linkage map of the chicken genome reveals sequence features  
855 correlated with recombination rate. *Genome Res.* **19**, 510-519.  
856 131. Li, W. & Freudenberg, J. 2009 Two-parameter characterization of chromosome-scale recombination rate. *Genome Res.*  
857 **19**, 2300-2307.  
858 132. Nagaoka, S. I., Hassold, T. J. & Hunt, P. a 2012 Human aneuploidy: mechanisms and new insights into an age-old  
859 problem. *Nat. Rev. Genet.* **13**, 493-504.  
860 133. Hassold, T., Hall, H. & Hunt, P. 2007 The origin of human aneuploidy: Where we have been, where we are going. *Hum.*  
861 *Mol. Genet.* **16**, 203-208.  
862 134. Petronczki, M., Siomos, M. F. & Nasmyth, K. 2003 Un ménage à quatre: The molecular biology of chromosome  
863 segregation in meiosis. *Cell.* **112**, 423-440.  
864 135. Hirose, Y., Suzuki, R., Ohba, T., Hinohara, Y., Matsuhara, H., Yoshida, M., Itabashi, Y., Murakami, H. & Yamamoto,  
865 A. 2011 Chiasmata promote monopolar attachment of sister chromatids and their co-segregation toward the proper pole  
866 during meiosis I. *PLoS Genet.* **7**, e1001329.  
867 136. Hunter, N. 2015 Meiotic recombination: The essence of heredity. *Cold Spring Harb. Perspect. Biol.* **7**.  
868 137. Hunt, P. a 2006 Meiosis in mammals: recombination, non-disjunction and the environment. *Biochem. Soc. Trans.* **34**,  
869 574-577.  
870 138. Hassold, T. & Hunt, P. 2001 To err (meiotically) is human: the genesis of human aneuploidy. *Nat. Rev. Genet.* **2**, 280-  
871 91.  
872 139. Giraut, L., Falque, M., Drouaud, J., Pereira, L., Martin, O. C. & Mézard, C. 2011 Genome-wide crossover distribution  
873 in *Arabidopsis thaliana* meiosis reveals sex-specific patterns along chromosomes. *PLoS Genet.* **7**.  
874 140. Bell, G. 1982 *The masterpiece of nature: the evolution and genetics of sexuality*. Berkeley: University of California  
875 Press.  
876 141. Hawley, S. & Theurkauf, W. 1993 Requiem for distributive segregation: achiasmate segregation in *Drosophila* females.  
877 *Trends Genet.* **9**, 310-316.  
878 142. Krishnaprasad, G. N., Anand, M. T., Lin, G., Tekkedil, M. M., Steinmetz, L. M. & Nishant, K. T. 2015 Variation in  
879 Crossover Frequencies Perturb Crossover Assurance Without Affecting Meiotic Chromosome Segregation in  
880 *Saccharomyces cerevisiae*. *Genetics* **199**, 399-412.  
881 143. Fledel-Alon, A., Wilson, D. J., Broman, K., Wen, X., Ober, C., Coop, G. & Przeworski, M. 2009 Broad-scale  
882 recombination patterns underlying proper disjunction in humans. *PLoS Genet.* **5**, e1000658.  
883 144. Wilfert, L., Gadau, J. & Schmid-Hempel, P. 2007 Variation in genomic recombination rates among animal taxa and the  
884 case of social insects. *Heredity* **98**, 189-197.  
885 145. Ross, L., Blackmon, H., Lorite, P., Gokhman, V. E. & Hardy, N. B. 2015 Recombination, chromosome number and  
886 eusociality in the Hymenoptera. *J. Evol. Biol.* **28**, 105-116.  
887 146. Dumont, B. L., White, M. a, Steffy, B., Dumont, B. L., White, M. a, Steffy, B., Wiltshire, T. & Payseur, B. a 2011  
888 Extensive recombination rate variation in the house mouse species complex inferred from genetic linkage maps. *Genome*  
889 *Res.* **21**, 114-125.  
890 147. Reynolds, A. et al. 2013 RNF212 is a dosage-sensitive regulator of crossing-over during mammalian meiosis. *Nat Genet*  
891 **45**, 269-278.  
892 148. Kong, A. et al. 2014 Common and low-frequency variants associated with genome-wide recombination rate. *Nat. Genet.*  
893 **46**, 11-6.  
894 149. Hunter, C. M., Huang, W., Mackay, T. F. C. & Singh, N. D. 2016 The Genetic Architecture of Natural Variation in  
895 Recombination Rate in *Drosophila melanogaster*. *PLoS Genet.* **12**, e1005951.  
896 150. Brown, A., Feingold, E., Broman, K. & Sherman, S. 2000 Genome-wide variation in recombination in female meiosis:  
897 a risk factor for non-disjunction of chromosome 21. *Hum. Mol. Genet.* **9**, 515-523.  
898 151. Louis, E. J. & Borts, R. H. 2003 Meiotic Recombination: Too Much of a Good Thing? *Curr. Biol.* **13**, R953-R955.  
899 152. Hassold, T., Sherman, S. & Hunt, P. 2000 Counting cross-overs: characterizing meiotic recombination in mammals. *Hum*  
900 *Mol Genet* **9**, 2409-2419.  
901 153. Hunter, N., Flemming, W. & Boveri, T. 2015 Meiotic Recombination : The Essence of Heredity.  
902 154. Séguéla-Arnaud, M. et al. 2015 Multiple mechanisms limit meiotic crossovers: TOP3  $\alpha$  and two BLM homologs  
903 antagonize crossovers in parallel to FANCM. *Proc. Natl. Acad. Sci. U. S. A.* **112**, 4713-8.  
904 155. Berchowitz, L. E. & Copenhaver, G. P. 2010 Genetic interference: don't stand so close to me. *Curr. Genomics* **11**, 91-  
905 102.  
906 156. Hillers, K. J. 2004 Crossover interference. *Curr. Biol.* **14**, R1036-R1037.  
907 157. Housworth, E. A. & Stahl, F. W. 2003 Crossover Interference in Humans. *Am. J. Hum. Genet.* **73**, 188-197.  
908 158. Wang, S., Zickler, D., Kleckner, N. & Zhang, L. 2015 Meiotic crossover patterns: obligatory crossover, interference and  
909 homeostasis in a single process. *Cell cycle* **14**, 305-14.  
910 159. Van Veen, J. E. & Hawley, R. S. 2003 Meiosis: When even Two Is a Crowd. *Curr. Biol.* **13**, 831-833.  
911 160. Maguire, M. 1980 Adaptive advantage for chiasma interference: a novel suggestion. *Heredity* **45**, 127-131.  
912 161. Goldstein, D. B., Bergman, A. & Feldman, M. W. 1993 The evolution of interference: reduction of recombination among  
913 three loci. *Theor. Popul. Biol.* **44**, 246-259.  
914 162. Wang, S., Zickler, D., Kleckner, N. & Zhang, L. 2015 and homeostasis in a single process. , 305-314.  
915 163. Aggarwal, D. D., Rashkovetsky, E., Michalak, P., Cohen, I., Ronin, Y., Zhou, D., Haddad, G. G. & Korol, A. B. 2015  
916 Experimental evolution of recombination and crossover interference in *Drosophila* caused by directional selection for  
917 stress-related traits. *BMC Biol.* **13**, 101.  
164. Burt, A., Bell, G. & Harvey, P. H. 1991 Sex differences in recombination. *J. Evol. Biol.* **4**, 259-277.

- 918 165. Lenormand, T. & Dutheil, J. 2005 Recombination difference between sexes: a role for haploid selection. *PLoS Biol.* **3**,  
919 396-403.  
920 166. Hedrick, P. W. 2007 Sex: Differences in mutation, recombination, selection, gene flow, and genetic drift. *Evolution* **61**,  
921 2750-2771.  
922 167. Haldane, J. B. S. 1922 Sex ratio and unisexual sterility in hybrid animals. *J. Genet.* **12**, 101-109.  
923 168. Huxley, J. S. 1928 Sexual difference of linkage in *Gammarus chevreuxi*. *J. Genet.* **20**, 145-156.  
924 169. Gruhn, J. R., Al-Asmar, N., Fasnacht, R., Maylor-Hagen, H., Peinado, V., Rubio, C., Broman, K. W., Hunt, P. A. &  
925 Hassold, T. 2015 Correlations between Synaptic Initiation and Meiotic Recombination: A Study of Humans and Mice.  
926 *Am. J. Hum. Genet.* **98**, 102-115.  
927 170. Petkov, P. M., Broman, K. W., Szatkiewicz, J. P. & Paigen, K. 2007 Crossover interference underlies sex differences in  
928 recombination rates. *Trends Genet.* **23**, 539-542.  
929 171. Morelli, M. A. & Cohen, P. E. 2005 Not all germ cells are created equal: Aspects of sexual dimorphism in mammalian  
930 meiosis. *Reproduction* **130**, 761-781.  
931 172. Burt, A. 2000 Perspective: sex, recombination and the efficacy of selection : was Weismann right? *Evolution* **54**, 337-  
932 351.  
933 173. Mank, J. E. 2009 The evolution of heterochiasmy: the role of sexual selection and sperm competition in determining sex-  
934 specific recombination rates in eutherian mammals. *Genet. Res.* **91**, 355-363.  
935 174. Lenormand, T. 2003 The evolution of sex dimorphism in recombination. *Genetics* **163**, 811-822.  
936 175. Úbeda, F. & Haig, D. 2005 On the evolutionary stability of Mendelian segregation. *Genetics* **170**, 1345-1357.  
937 176. Joseph, S. B. & Kirkpatrick, M. 2004 Haploid selection in animals. *Trends Ecol. Evol.* **19**, 592-597.  
938 177. Brandvain, Y. & Coop, G. 2012 Scrambling eggs: meiotic drive and the evolution of female recombination rates.  
939 *Genetics* **190**, 709-23.  
940 178. Paigen, K. & Petkov, P. 2010 Mammalian recombination hot spots: properties, control and evolution. *Nat. Rev. Genet.*  
941 **11**, 221-33.  
942 179. de Massy, B. 2013 Initiation of meiotic recombination: how and where? Conservation and specificities among  
943 eukaryotes. *Annu. Rev. Genet.* **47**, 563-99.  
944 180. Choi, K. & Henderson, I. R. 2015 Meiotic recombination hotspots - A comparative view. *Plant J.* **83**, 52-61.  
945 181. Keeney, S. 2008 Spo11 and the Formation of DNA Double-Strand Breaks in Meiosis. *Genome Dyn. Stab.* **2**, 81-123.  
946 182. Kaur, T. & Rockman, M. V. 2014 Crossover heterogeneity in the absence of hotspots in *Caenorhabditis elegans*. *Genetics*  
947 **196**, 137-148.  
948 183. Comeron, J. M., Ratnappan, R. & Bailin, S. 2012 The Many Landscapes of Recombination in *Drosophila melanogaster*.  
949 *PLoS Genet.* **8**, 33-35.  
950 184. Pan, J. et al. 2011 A hierarchical combination of factors shapes the genome-wide topography of yeast meiotic  
951 recombination initiation. *Cell* **144**, 719-731.  
952 185. Choi, K. et al. 2013 Arabidopsis meiotic crossover hot spots overlap with H2A.Z nucleosomes at gene promoters. *Nat.*  
953 *Genet.* **45**, 1327-36.  
954 186. Singhal, S. et al. 2015 Stable recombination hotspots in birds. *Science* **350**, 928-32.  
955 187. Wijnker, E. et al. 2013 The genomic landscape of meiotic crossovers and gene conversions in *Arabidopsis thaliana*. *Elife*  
956 **2013**, 1-22.  
957 188. Brick, K., Smagulova, F., Khil, P., Camerini-Otero, R. D. & Petukhova, G. V 2012 Genetic recombination is directed  
958 away from functional genomic elements in mice. *Nature* **485**, 642-5.  
959 189. Baudat, F., Buard, J., Grey, C., Fledel-Alon, A., Ober, C., Przeworski, M., Coop, G. & de Massy, B. 2010 PRDM9 Is a  
960 Major Determinant of Meiotic Recombination Hotspots in Humans and Mice. *Science* **327**, 836-840.  
961 190. Stevison, L. S., Woerner, A. E., Kidd, J. M., Kelley, J. L., Veeramah, K. R., McManus, K. F., Bustamante, C. D.,  
962 Hammer, M. F. & Wall, J. D. 2016 The Time Scale of Recombination Rate Evolution in Great Apes. *Mol. Biol. Evol.*  
963 **33**, 928-45.  
964 191. Auton, A. et al. 2013 Genetic Recombination Is Targeted towards Gene Promoter Regions in Dogs. *PLoS Genet.* **9**,  
965 e1003984.  
966 192. Fyon, F., Cailleau, A. & Lenormand, T. 2015 Enhancer Runaway and the Evolution of Diploid Gene Expression. *PLoS*  
967 *Genet.* **11**, e1005665.  
968 193. Jeffreys, A. J. & Neumann, R. 2002 Reciprocal crossover asymmetry and meiotic drive in a human recombination hot  
969 spot. *Nat. Genet.* **31**, 267-71.  
970 194. Boulton, A., Myers, R. S. & Redfield, R. J. 1997 The hotspot conversion paradox and the evolution of meiotic  
971 recombination. *Proc. Natl. Acad. Sci.* **94**, 8058-8063.  
972 195. Úbeda, F. & Wilkins, J. F. 2011 The Red Queen theory of recombination hotspots. *J. Evol. Biol.* **24**, 541-553.  
973 196. Lesecque, Y., Glémin, S., Lartillot, N., Mouchiroud, D. & Duret, L. 2014 The Red Queen Model of Recombination  
974 Hotspots Evolution in the Light of Archaic and Modern Human Genomes. *PLoS Genet.* **10**, 1-14.  
975 197. Lynch, M., Field, M. C., Goodson, H. V, Malik, H. S., Pereira-Leal, J. B., Roos, D. S., Turkewitz, A. P. & Sazer, S. 2014  
976 Evolutionary cell biology: two origins, one objective. *Proc. Natl. Acad. Sci. U. S. A.* **111**, 16990-4.  
977 198. Rice, W. R. 2013 Nothing in Genetics Makes Sense Except in Light of Genomic Conflict. *Annu. Rev. Ecol. Evol. Syst.*  
978 **44**, 217-237.  
979  
980

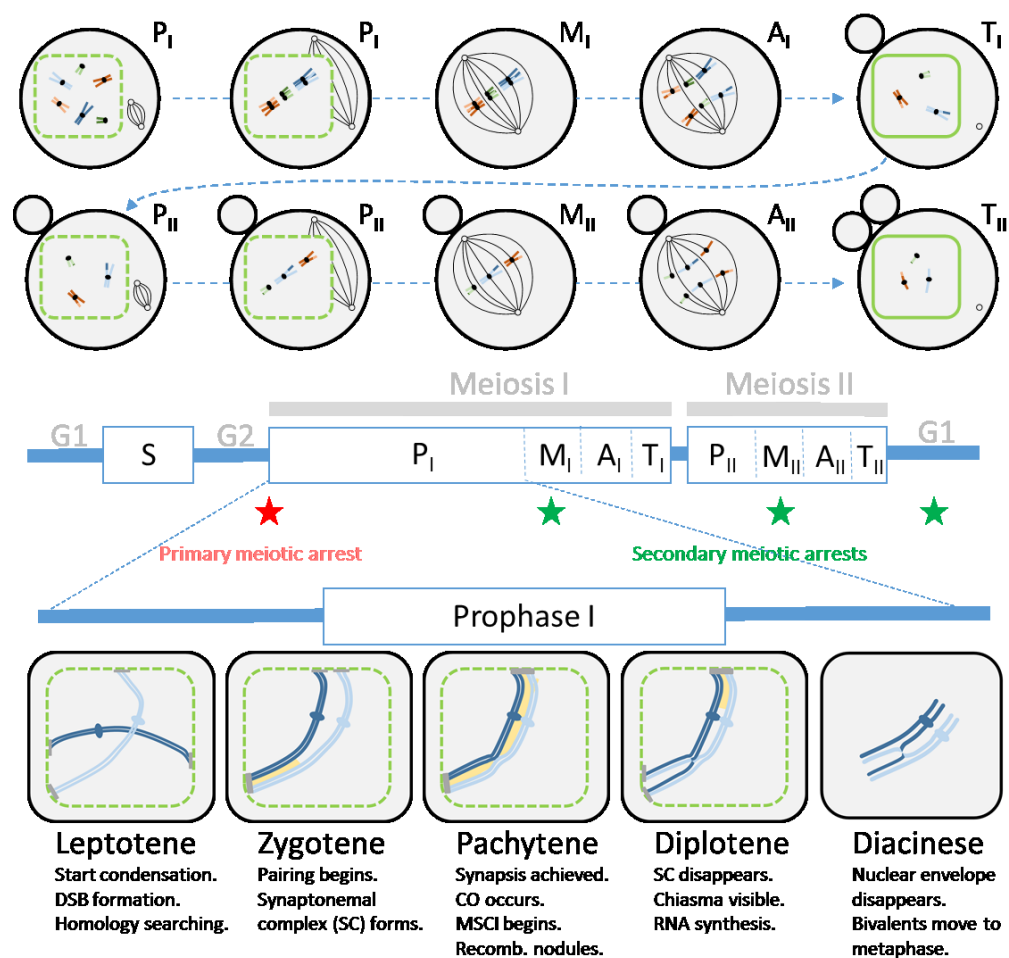

981  
982

983 Figure 1. Schematic representation of the different steps in standard meiosis. The top  
984 panel illustrates the different phases of a typical female meiosis for each of the two  
985 meiotic divisions: prophase (P, with early and late prophase distinguished), metaphase  
986 (M), anaphase (A) and telophase (T). The nuclear membrane is indicated by the green  
987 contour (dashed when it starts fragmenting). The small black circles represent  
988 microtubule organizing centres and the black lines represent microtubules of the meiotic  
989 spindle. First and second polar bodies are shown as grey circles next to the oocyte  
990 (chromosomes inside the polar bodies are not shown). Homologous chromosomes are  
991 represented with the same colour with slightly different shades (e.g. orange and light  
992 orange). Homologues pair and segregate in meiosis I, then sister chromatids segregate in  
993 meiosis II. The middle panel shows the meiotic cell cycle. The timing of the primary  
994 meiotic arrest is indicated by a red star, while the timing of the most common secondary  
995 arrests in different organisms is indicated by green stars (see section 3.1). The lower  
996 panel indicates the important steps (DSB formation, crossing overs) occurring during  
997 prophase I. The synaptonemal complex is shown in yellow. Chromatin condenses in  
998 chromosomes throughout prophase I (only one pair of homologues is illustrated). In most



999 species, telomeres attach to the nuclear envelope. The attachment plate is indicated by a  
1000 grey bar. MSCI refers to meiotic sex chromosome inactivation (see section 3.4).

1001

1002

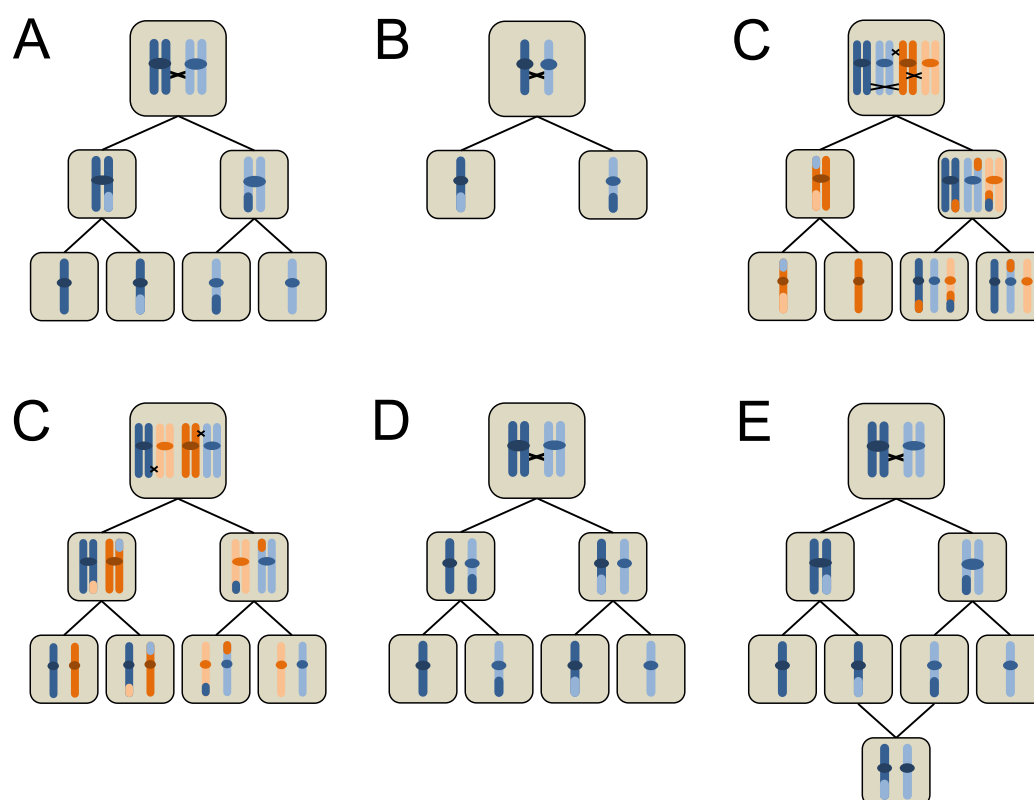

1003

1004

1005

1006

1007

1008

1009

1010

1011

1012

1013

1014

1015

1016

1017

1018

1019

1020

1021

1022

Figure 2. Schematic representation of meiosis and some of its modifications. (A) Regular meiosis. Following DNA replication, homologous chromosomes are separated in the first meiotic division, whereas sister chromatids are separated in the second division. COs result in chromosomes in the final meiotic products that carry genetic material from both homologous chromosomes. (B) Hypothetical “one-step” meiosis, in which DNA replication before entering meiosis is suppressed and therefore only a single meiotic division is required. (C) Multivalent formation in a neo-tetraploid. Blue and orange chromosome pairs are assumed to be identical or very similar so that pairing can occur. Chiasmata of one chromosome with three other chromosomes leads to mis-segregation. (D) Bivalent formation in a tetraploid with exactly one CO per chromosome. Chromosomes may pair randomly (leading to polysomic inheritance), but segregation proceeds normally. (E) Inverted meiosis, in which sister chromatids are separated in the first division and homologous chromosomes in the second division. Note that although centromeres are shown here for clarity, all described species consistently using inverted meiosis are holokinetic (no centromeres). (F) Central fusion automixis, a mechanism of producing diploid eggs that can then develop parthenogenetically without fertilisation. As a consequence of COs, heterozygosity may be lost with this mechanism in regions distal to the centromere.

1023

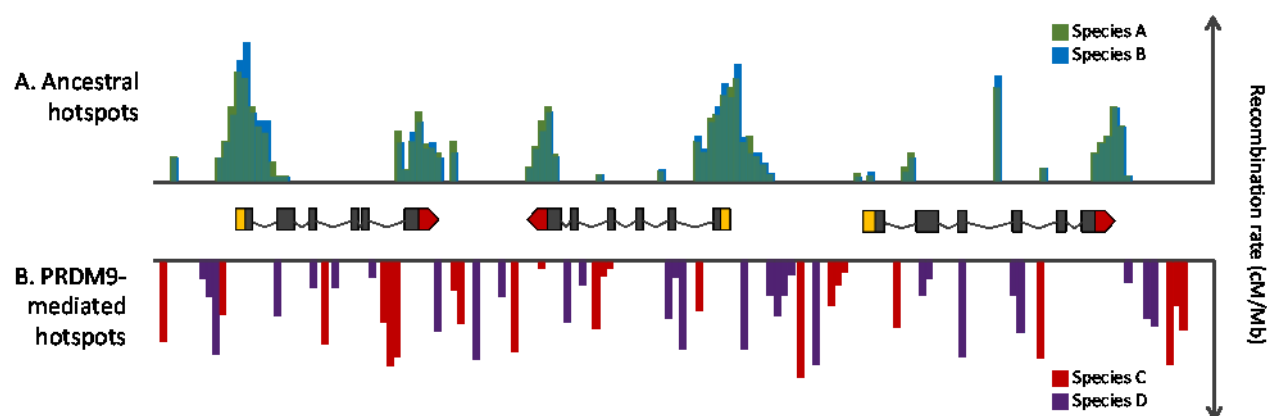

1024

1025 Fig. 3. Hypothetical genome sequence containing three genes showing the distribution of  
1026 ancient recombination hotspots in most model species (A) compared to derived PRDM9-  
1027 mediated recombination hotspots (B). Studies in fungi, plants, birds and dogs indicate  
1028 that ancestral hotspots are stable over long evolutionary timescales (up to millions of  
1029 years) and concentrate at promoter regions and transcription start sites (and at stop sites  
1030 in some species). These start and stop sites for each gene are indicated in yellow and red  
1031 blocks, with their introns and exons represented by lines and black blocks, respectively.  
1032 PRDM9-mediated hotspots are found in some mammals, including humans and mice, and  
1033 are directed away from promotor regions. The DNA-binding zinc-finger in the PRDM9  
1034 protein targets specific sequence motifs; mutations in the zinc-finger array change the  
1035 targeted motif, leading to rapid evolution of hotspot positions and an absence of hotspot  
1036 conservation over short evolutionary time-scales (at the population and species level).  
1037
